# Supplementary material for: SLC20A1 is a prospective prognostic and therapy response predictive biomarker in head and neck squamous cell carcinoma
Source: publisher site journal article supplement (doi:10.18632/aging.205597), 2024-02-26
Supplement: Supplementary file [file aging-v16i5-205597-supplementary-material-SD1.pdf]

SUPPLEMENTARY FIGURES

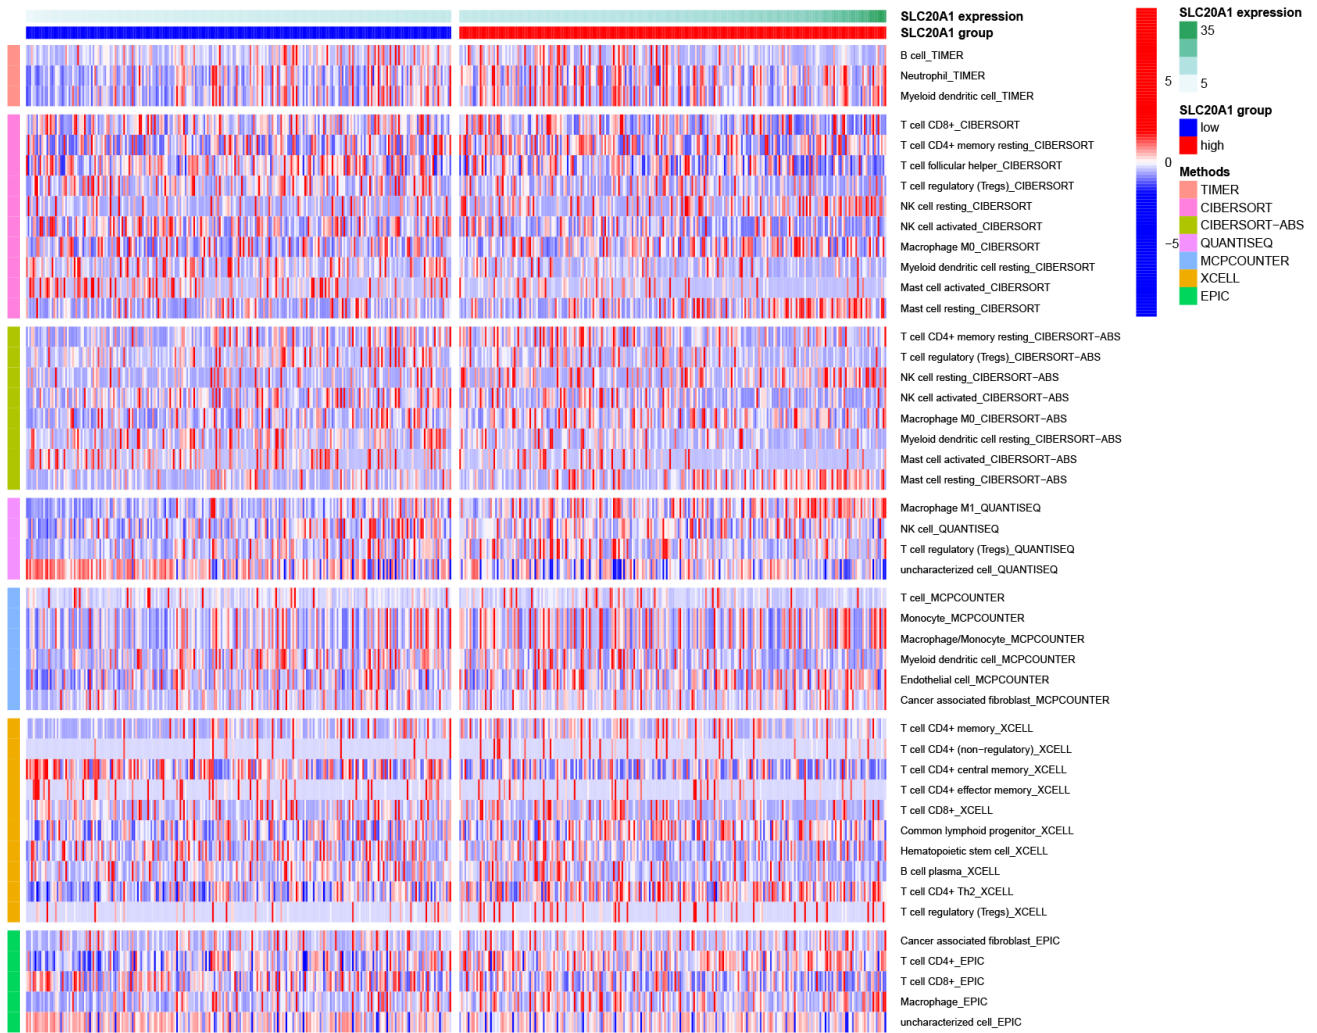

Supplementary Figure 1. Heatmap of SLC20A1 overexpression related to immune cells in HNSCC.

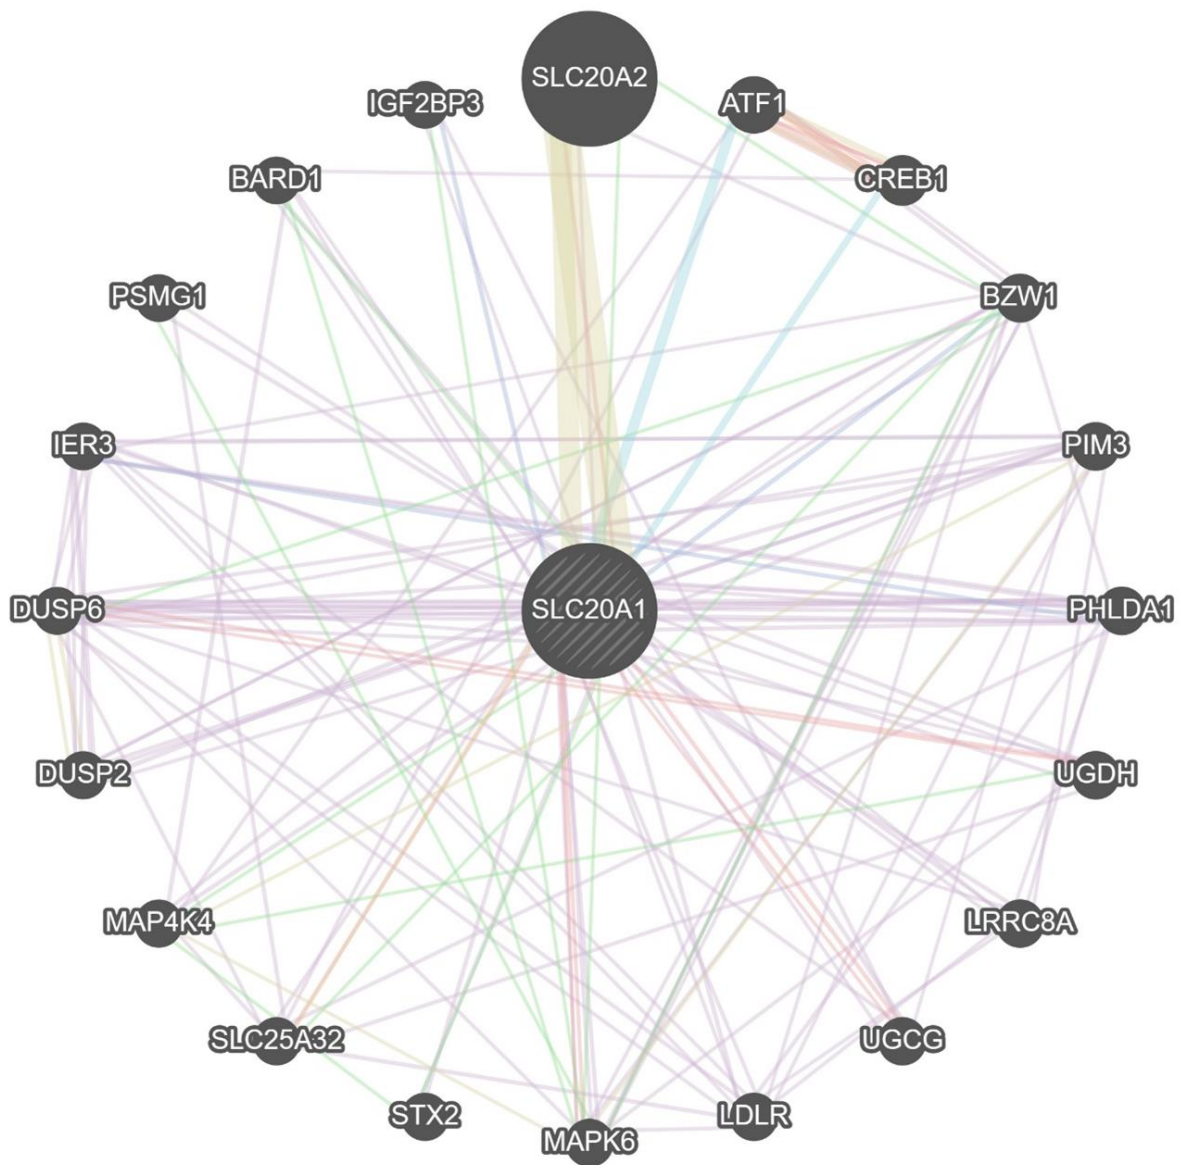

Supplementary Figure 2. Protein-protein interaction network of SLC20A1.

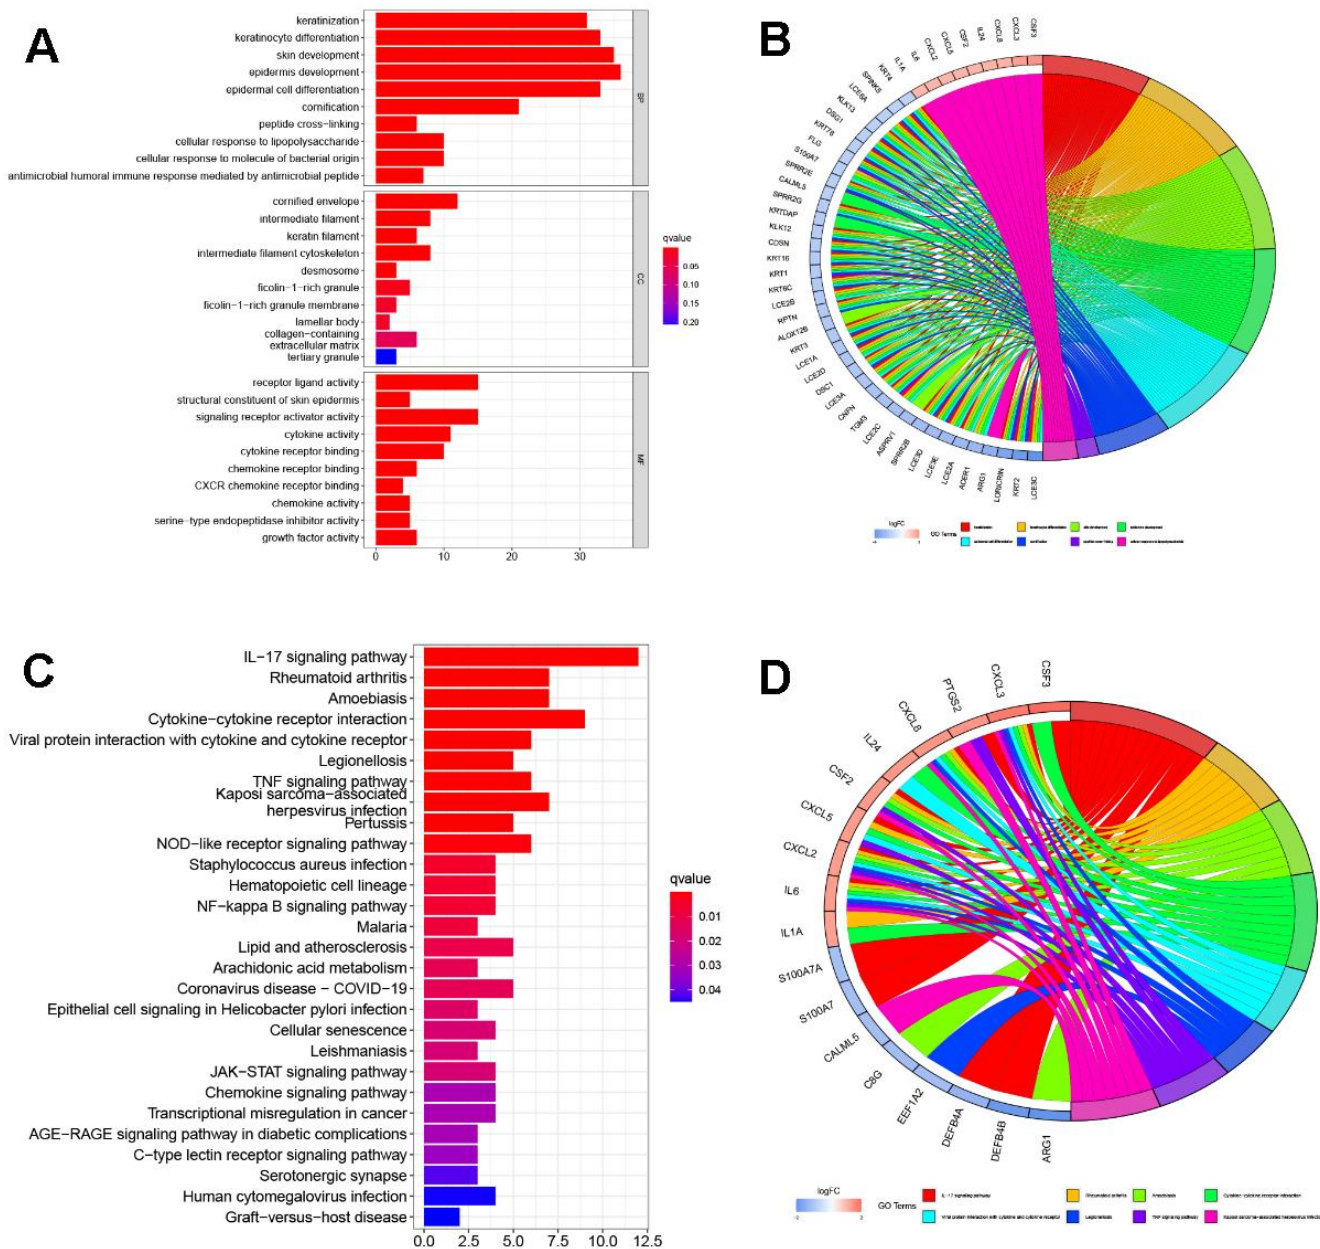

**Supplementary Figure 3. Gene function enrichment analysis.** (A, B) Underlying molecular mechanism enriched by SLC20A1 from GO analysis. (C, D) Biological processes enriched by SLC20A1 from KEGG analysis.

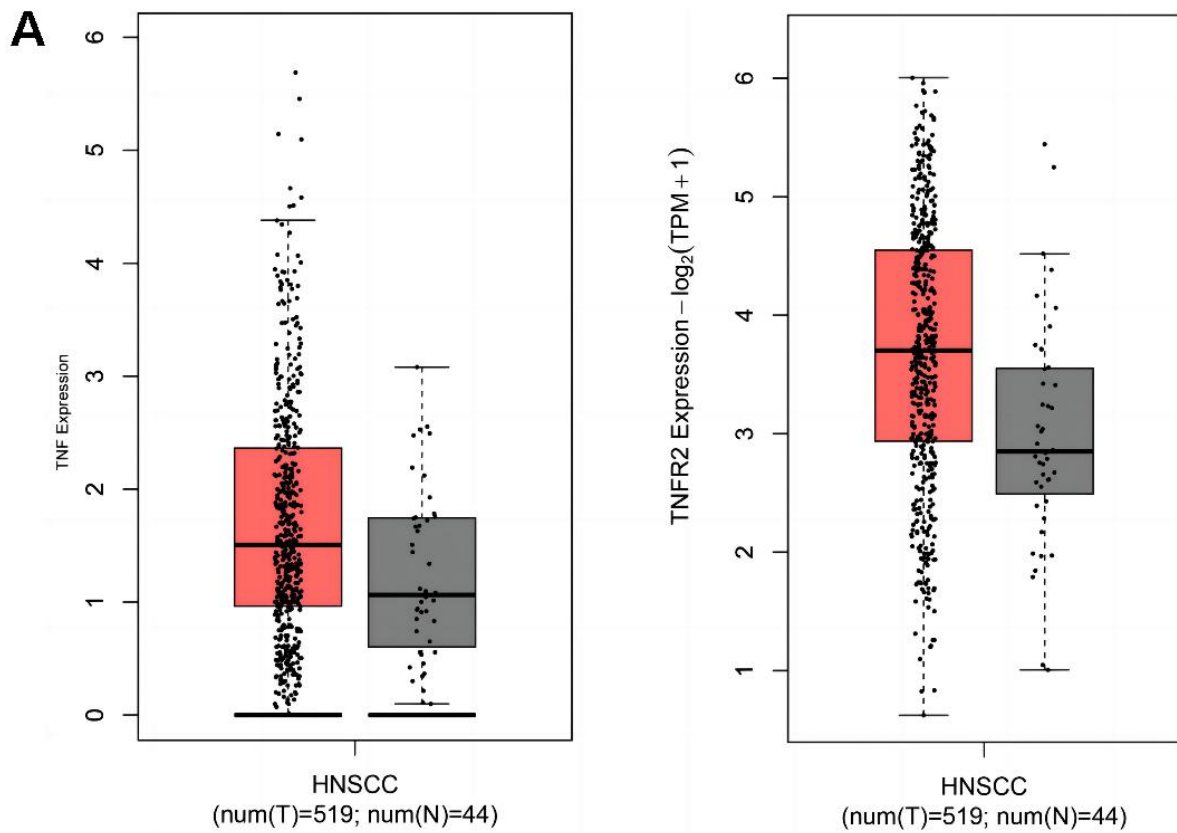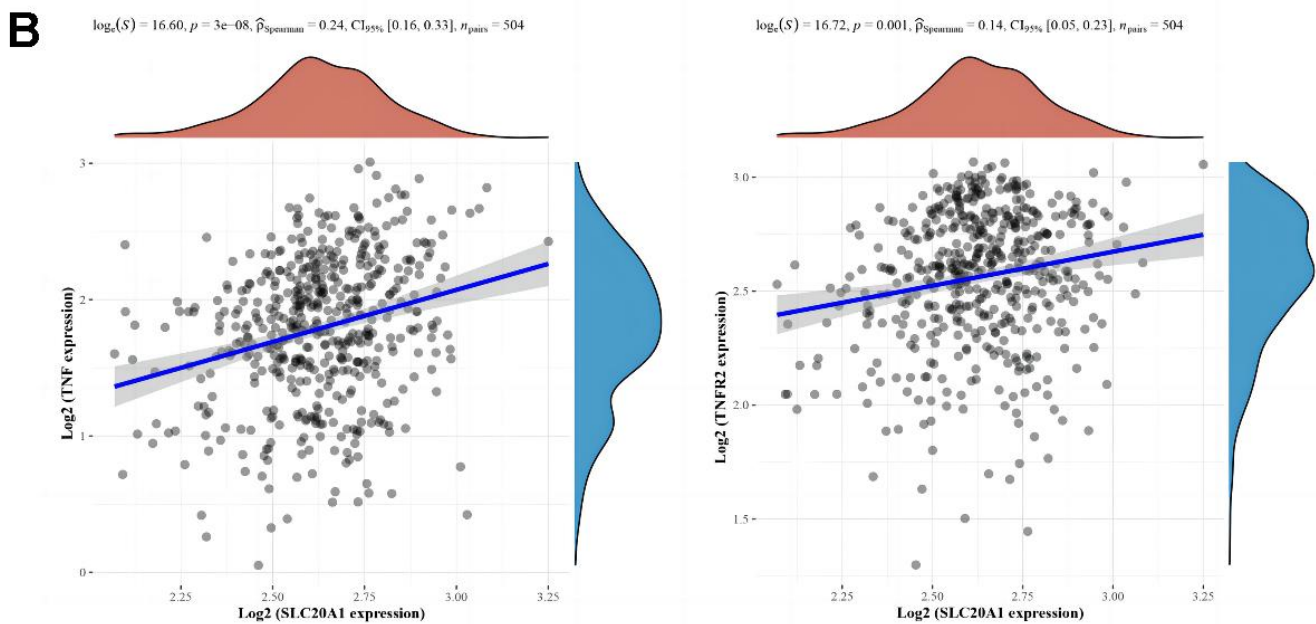

**Supplementary Figure 4. Comparative analysis of TNF, TNFR2, and SLC20A1 expression in HNSCC and normal tissues from the TCGA database. (A)** The expression levels of TNF and TNFR2 in head and neck squamous cell carcinoma and normal tissues; **(B)** the relationship between SLC20A1 expression and the levels of TNF and TNFR2 in head and neck squamous cell carcinoma.

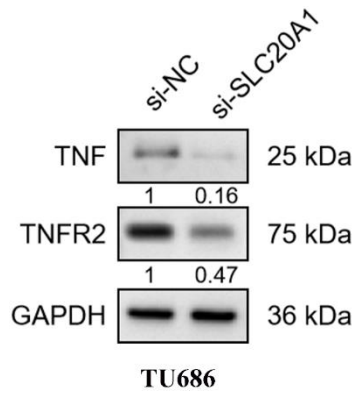

**Supplementary Figure 5. Western blot analysis of the relationship between SLC20A1 expression and the levels of TNF and TNFR2 in the head and neck squamous cell carcinoma TU686 cell line.**

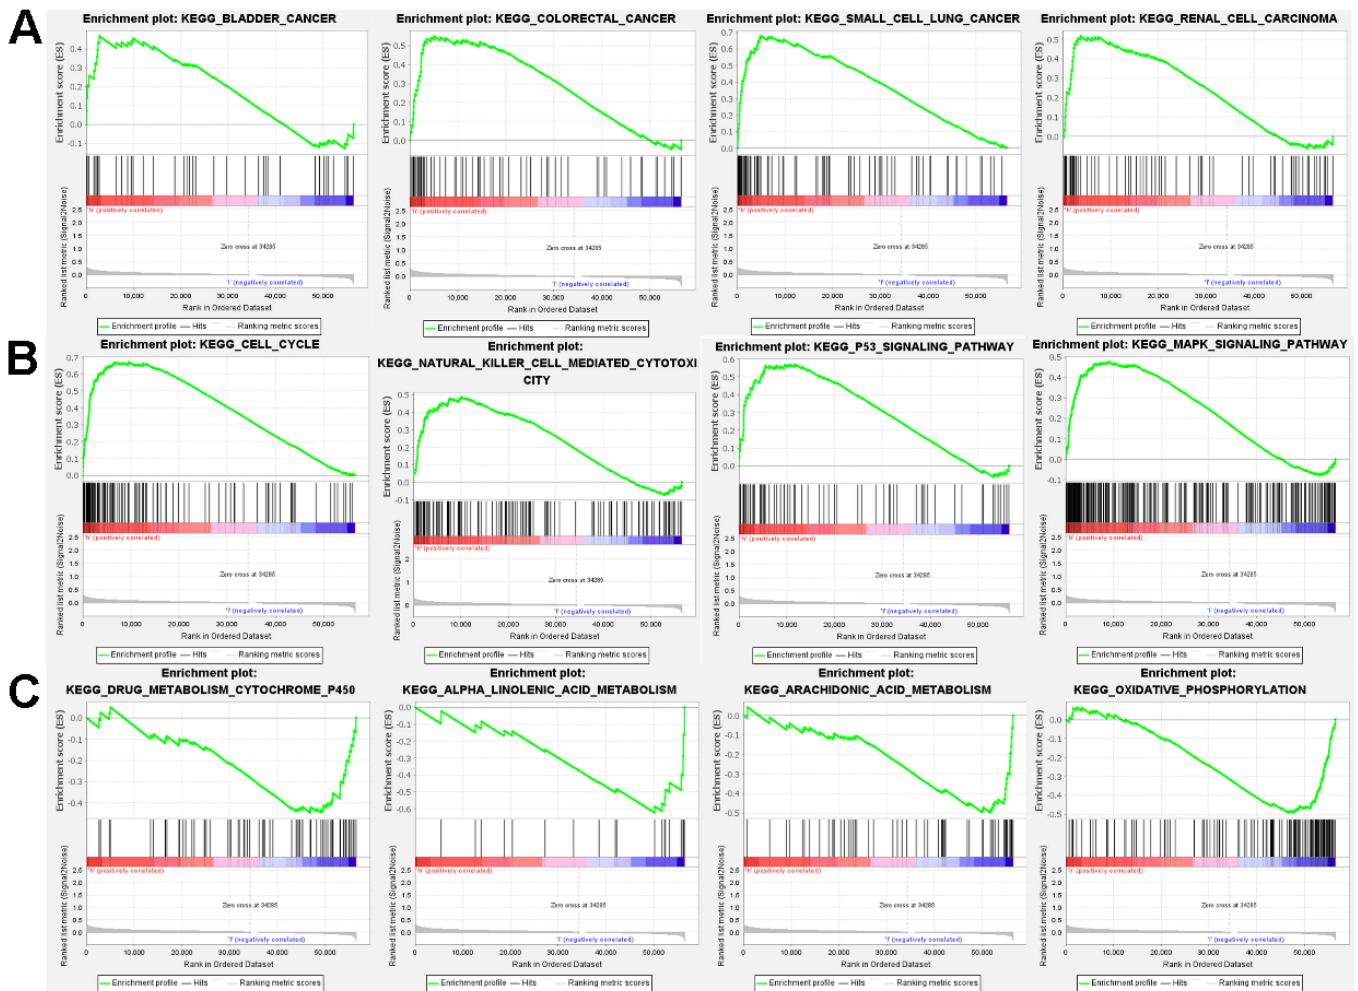

**Supplementary Figure 6. SLC20A1-related signaling pathways based on GSEA. (A, B) GSEA enrichment in the high-SLC20A1 expression phenotype. (C) GSEA enrichment in the low-SLC20A1 expression phenotype.**
